# Supplementary material for: Enhancing Engagement of Fathers in Web-Based Preventive Parenting Programs for Adolescent Mental Health: A Discrete Choice Experiment
Source: Int J Environ Res Public Health. 2021 Nov 24;18(23):12340. doi: 10.3390/ijerph182312340 (PMC8656658; doi:10.3390/ijerph182312340)
Supplement: Supplementary file 1 [file ijerph-18-12340-s001.zip › ijerph-1455504-supplementary.pdf]

## Supplemental Materials

Supplemental Table S1. *Predictors of father program choice.*

|                                                              | $\beta$ (95% CI)     | <i>p</i> |
|--------------------------------------------------------------|----------------------|----------|
| Number of sessions                                           | -0.08 (-0.11, -0.05) | < .01    |
| Program benefits                                             |                      |          |
| Build relationship with adolescent                           | 0.01 (-0.04, 0.06)   | .83      |
| Prevent adolescent experiencing mental health issues         | -0.02 (-0.07, 0.03)  | .70      |
| Program participants                                         |                      |          |
| Parenting partner                                            | 0.39 (0.34, 0.44)    | < .001   |
| Adolescent child                                             | 0.54 (0.49, 0.59)    | < .001   |
| User control                                                 | -0.19 (-0.23, -0.15) | < .01    |
| Number of sessions x Program participants: parenting partner | 0.13 (0.09, 0.17)    | < .001   |

Supplemental Table S2. *Influence of father demographic characteristics on predictors of program choice.*

|                                                                                 | $\beta$ (95% CI)     | <i>p</i> |
|---------------------------------------------------------------------------------|----------------------|----------|
| Number of sessions                                                              | -0.09 (-0.25, 0.09)  | .61      |
| Program benefits                                                                |                      |          |
| Build relationship with adolescent                                              | -0.37 (-0.58, -0.15) | .09      |
| Prevent adolescent experiencing mental health issues                            | 0.03 (-0.03, 0.09)   | .66      |
| Program participants                                                            |                      |          |
| Parenting partner                                                               | -1.39 (-1.76, -1.02) | < .001   |
| Adolescent child                                                                | -0.06 (-0.43, 0.31)  | .86      |
| User control                                                                    | -0.19 (-0.24, -0.14) | < .001   |
| Number of sessions x Program participants: parenting partner                    | 0.15 (0.10, 0.20)    | < .01    |
| Number of sessions x Dual working family                                        | 0.14 (0.07, 0.21)    | .04      |
| Number of sessions x Adolescent mental health diagnosis                         | -0.09 (-0.17, -0.01) | .27      |
| Number of sessions x Father mental health diagnosis                             | -0.03 (-0.11, 0.05)  | .69      |
| Program benefits: build x Father mental health diagnosis                        | 0.21 (0.09, 0.33)    | .09      |
| Program participants: partners x Prior program use                              | 0.39 (0.26, 0.52)    | < .01    |
| Program participants: partners x Role of parenting for adolescent mental health | 0.43 (0.33, 0.53)    | < .001   |
| Program participants: partners x Dual working family                            | 0.26 (0.13, 0.39)    | .05      |
| Program participants: partners x Adolescent mental health diagnosis             | -0.08 (-0.25, 0.09)  | .65      |
| Program participants: partners x Father mental health diagnosis                 | -0.02 (-0.16, 0.12)  | .87      |
| Program participants: teens x Education                                         | -0.34 (-0.45, -0.23) | < .01    |
| Program participants: teens x Role of parenting for adolescent mental health    | 0.40 (0.31, 0.49)    | < .001   |
| Program participants: teens x Adolescent mental health diagnosis                | 0.10 (-0.04, 0.24)   | .51      |
